# Supplementary material
Source: PubMed Central journal article supplement (PMC4624921)

## A. Pathway level analysis

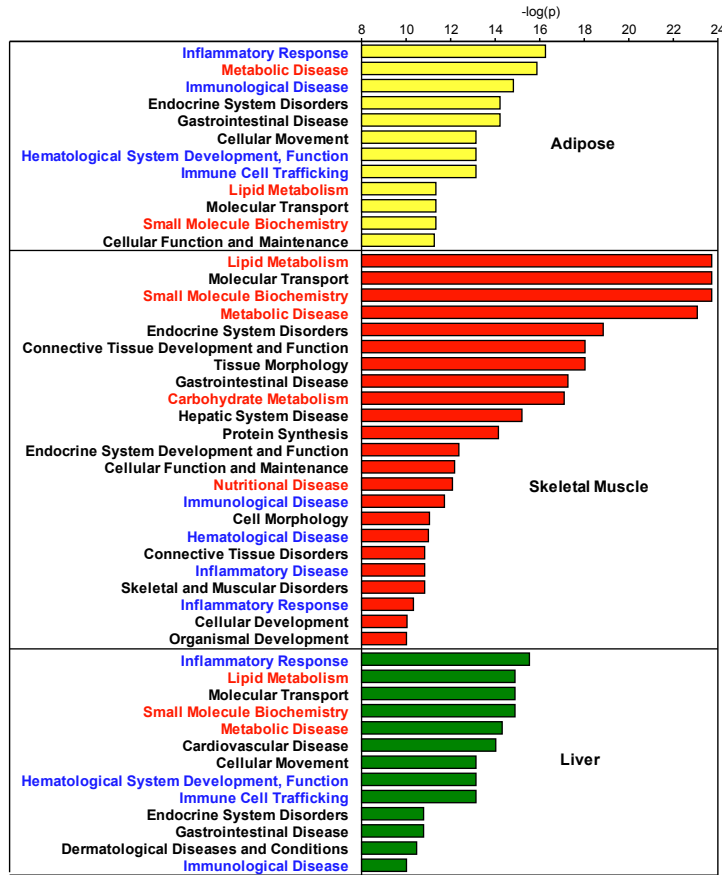

## B. Gene level meta analysis

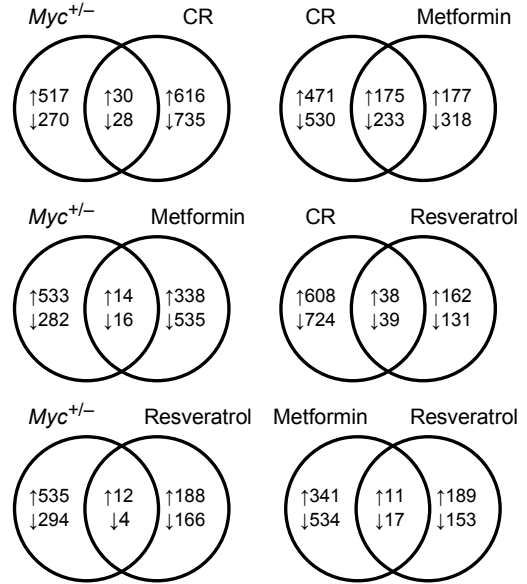

## C. Pathway level meta analysis

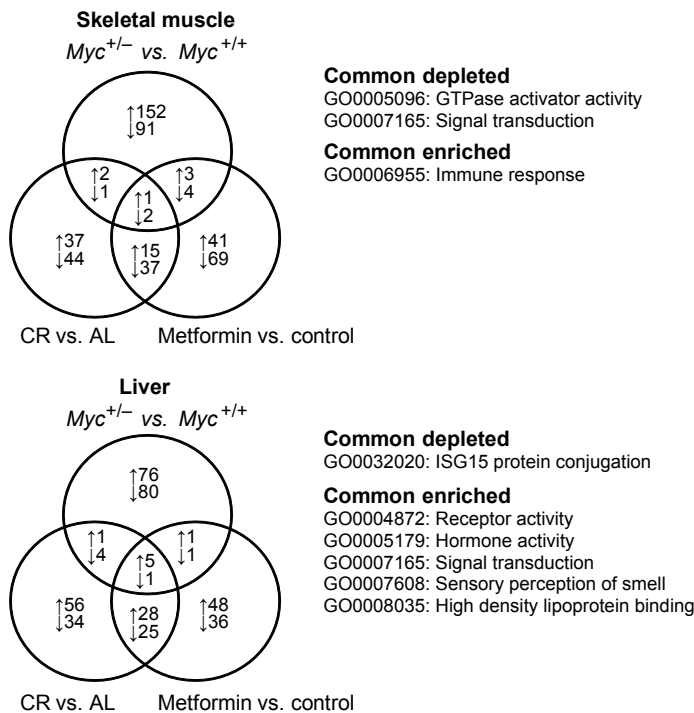

## D. Resistance of mouse tail fibroblasts

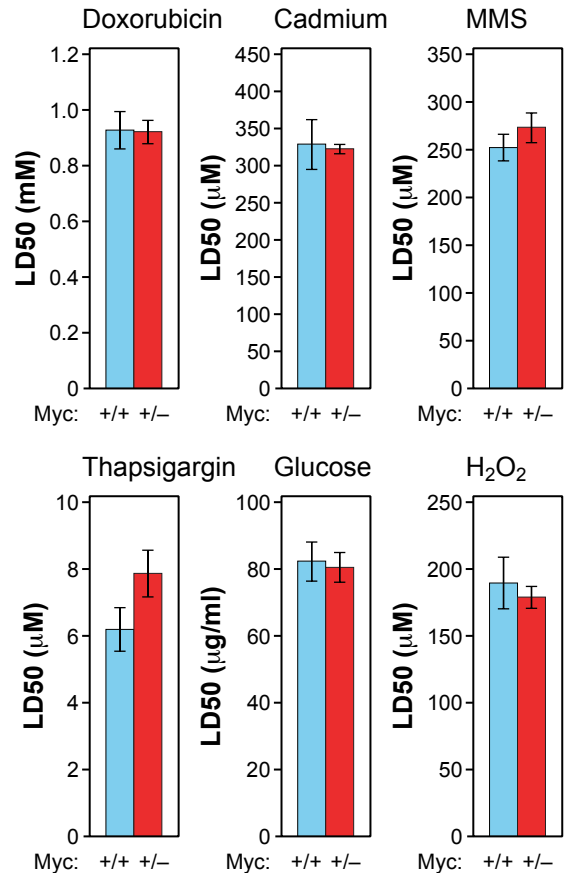

Supplement: NIHMS649288-supplement-3.pdf [file NIHMS649288-supplement-3.pdf]
