# Supplementary material
Source: PubMed Central journal article supplement (PMC4624921)

**A. Carbon dioxide production – young**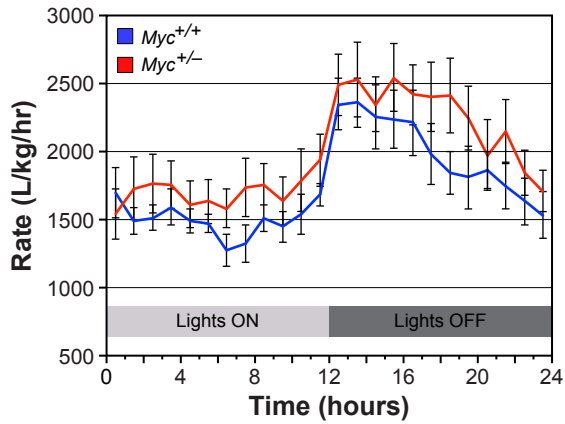**B. Carbon dioxide production – old**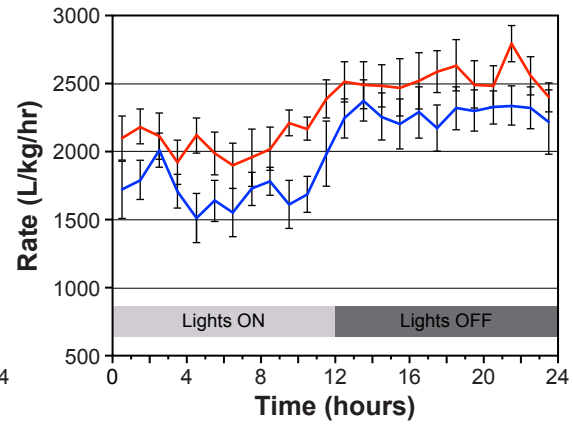**C. Cumulative food intake**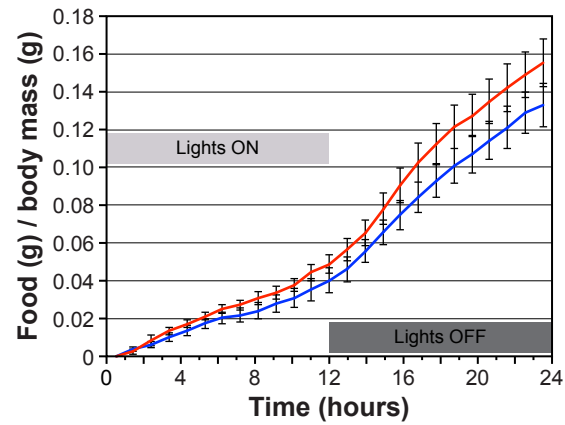**D. Cumulative water intake**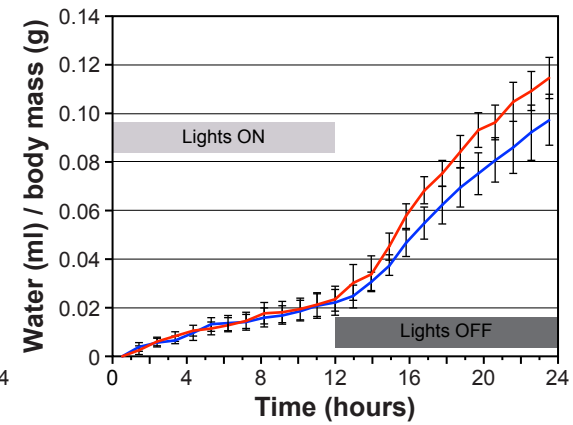**E. Body temperature**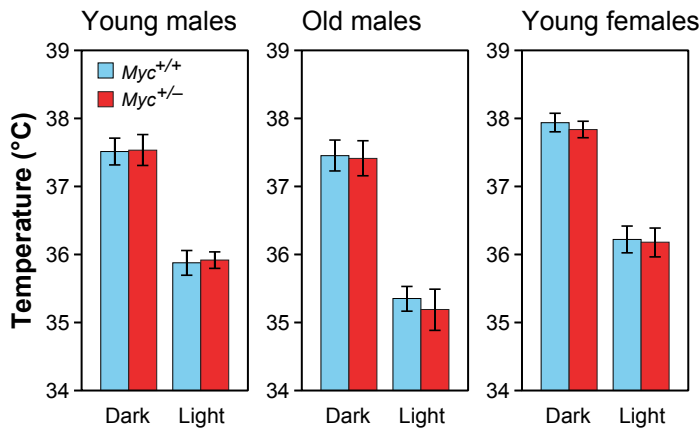**F. Mitochondrial DNA**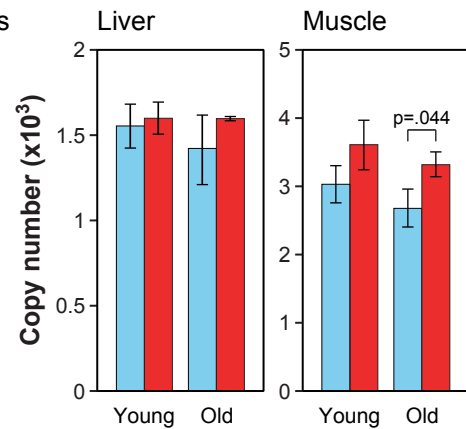

Supplement: NIHMS649288-supplement-5.pdf [file NIHMS649288-supplement-5.pdf]
