# Supplementary material
Source: PubMed Central journal article supplement (PMC4624921)

### A. All active movements

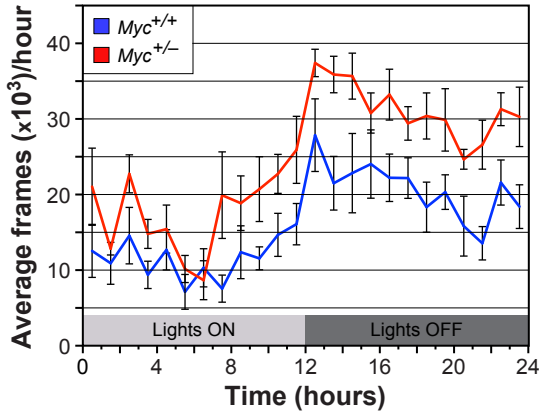

### B. Hanging

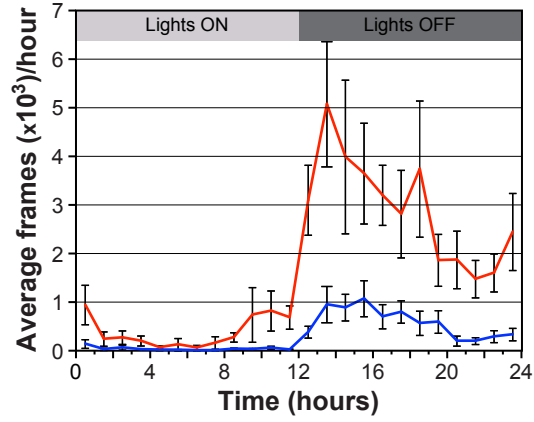

### C. Grooming

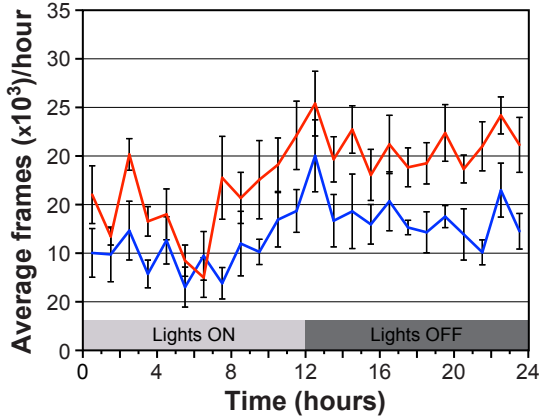

### D. Micromovements

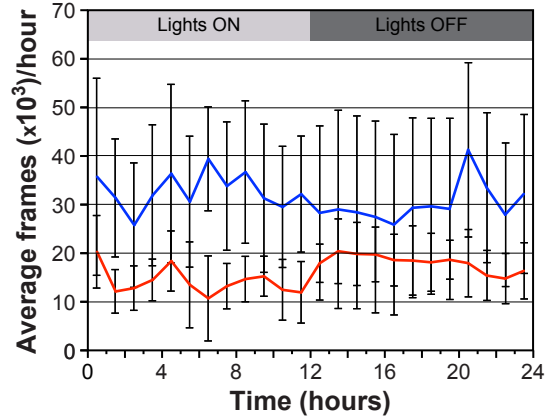

### E. AMP

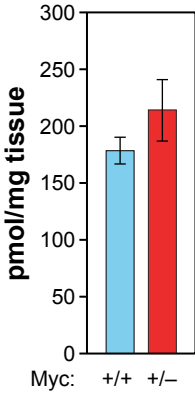

### F. AMP/ATP

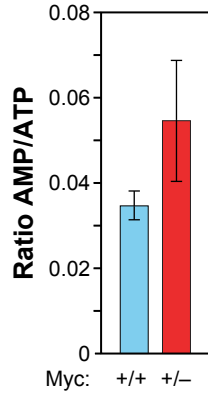

### G. ADP

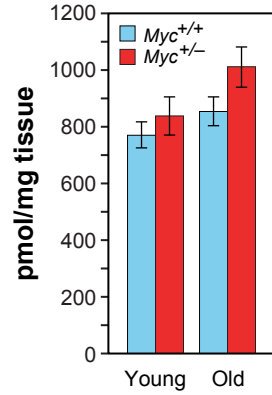

### H. ATP

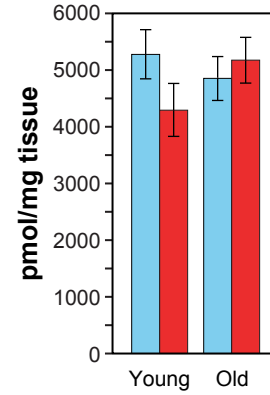

### I. AMP/ATP liver

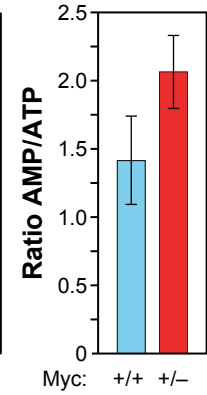

### J. Liver metabolites

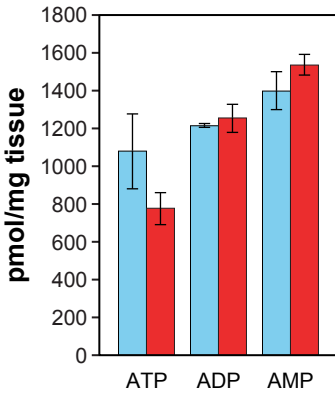

### K. Relative expression of Rpl genes

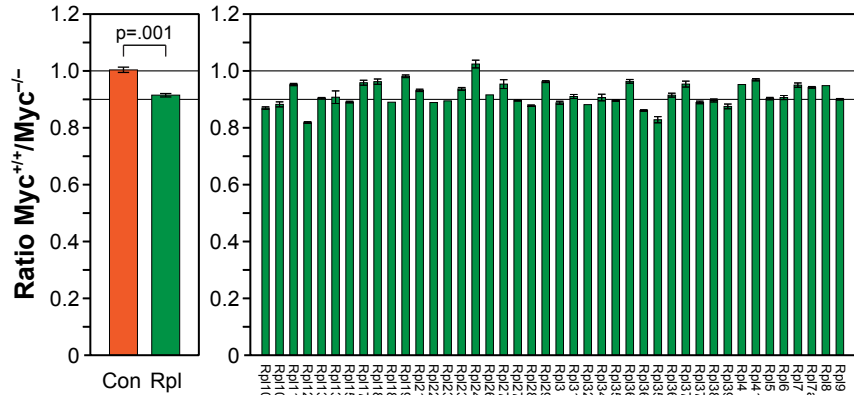

Supplement: NIHMS649288-supplement-6.pdf [file NIHMS649288-supplement-6.pdf]
