# Supplementary material
Source: PubMed Central journal article supplement (PMC4624921)

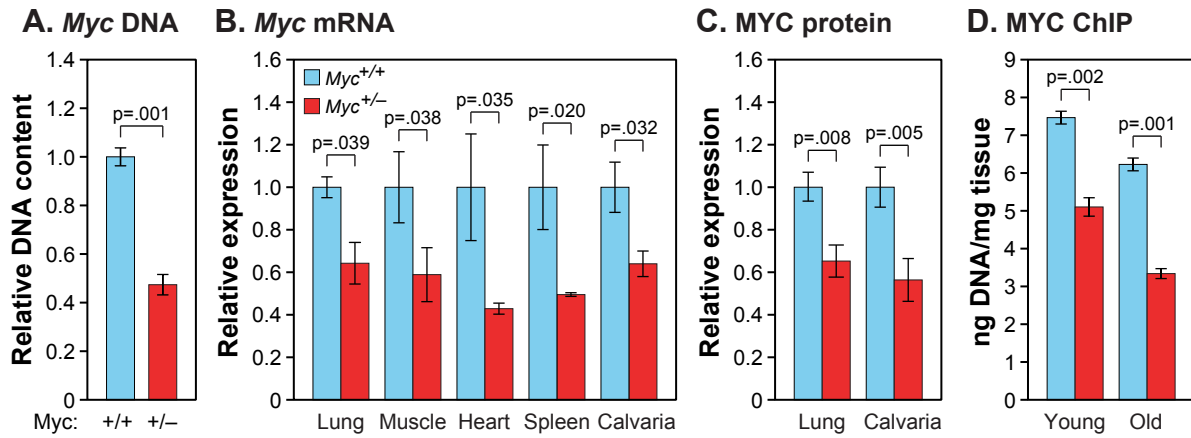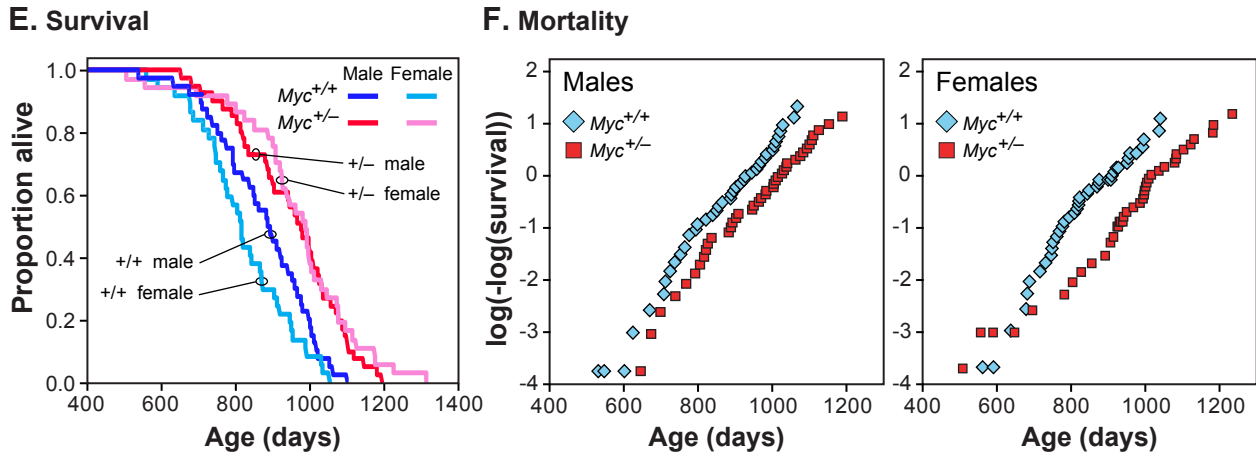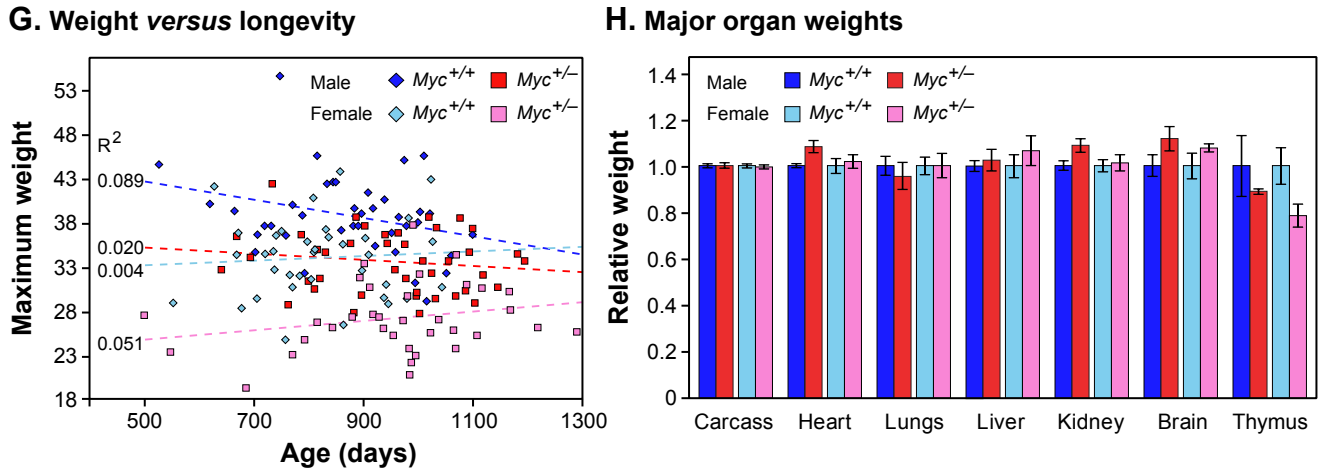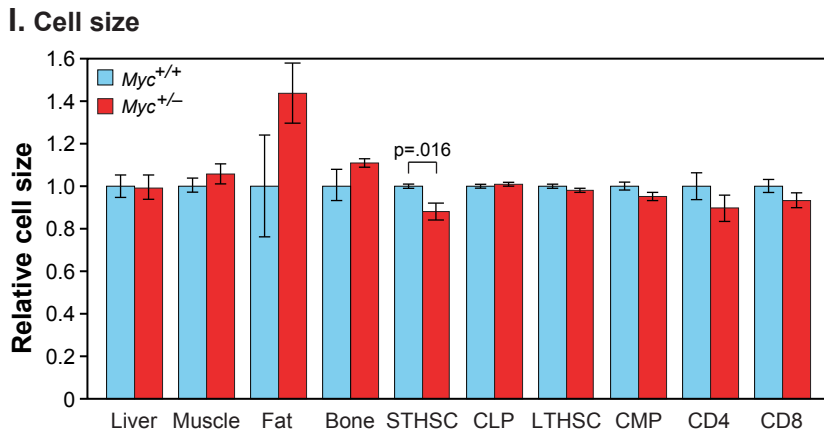

Supplement: NIHMS649288-supplement-1.pdf [file NIHMS649288-supplement-1.pdf]

**A. Average litter size**

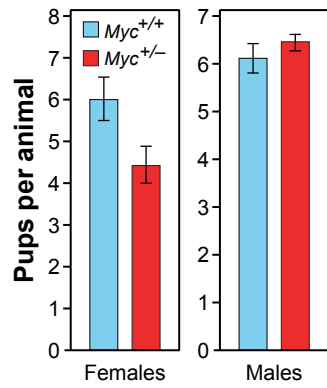

**B. Lifetime fecundity**

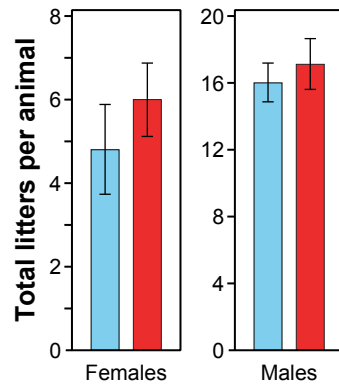

**C. Reproductive longevity**

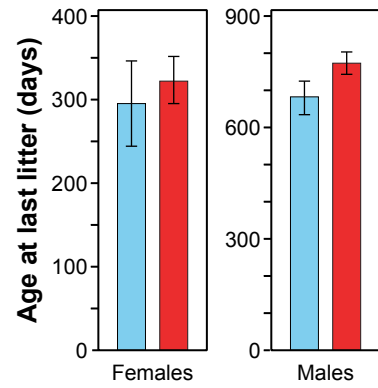

**D. Wound healing**

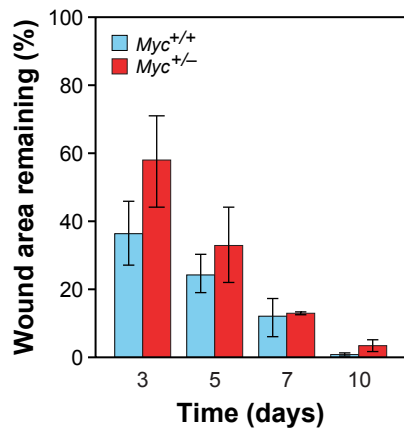

Supplement: NIHMS649288-supplement-2.pdf [file NIHMS649288-supplement-2.pdf]

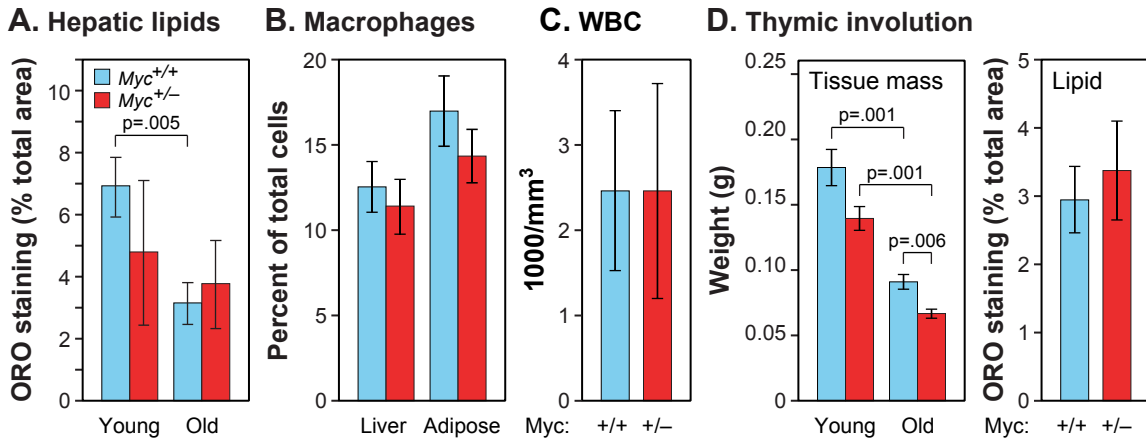

**E. Cellular senescence**

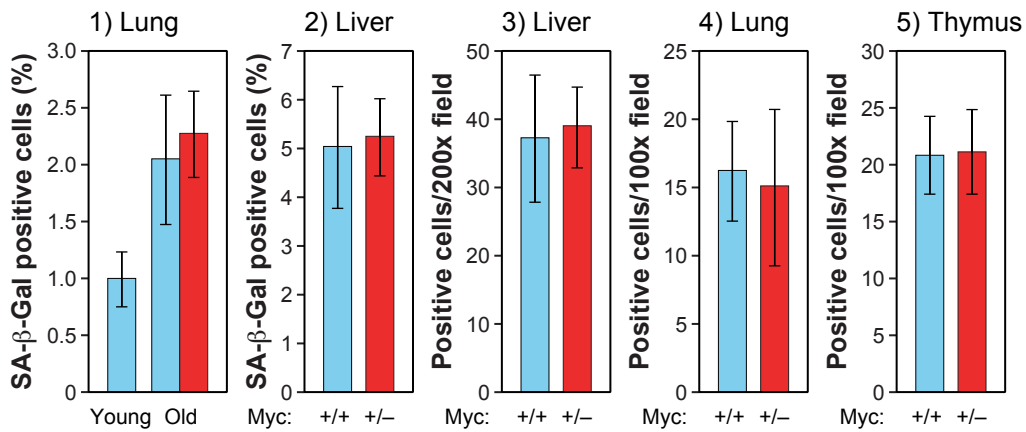

**F. p21 expression**

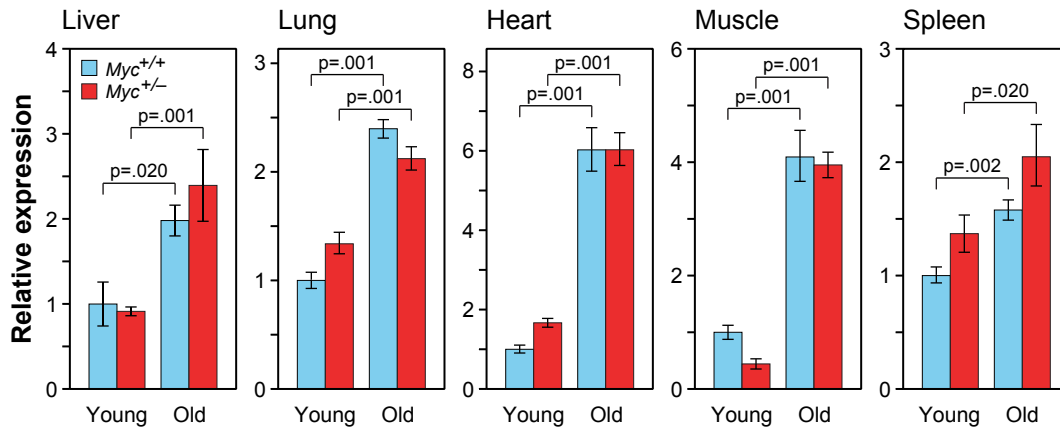

**G. p16 expression**

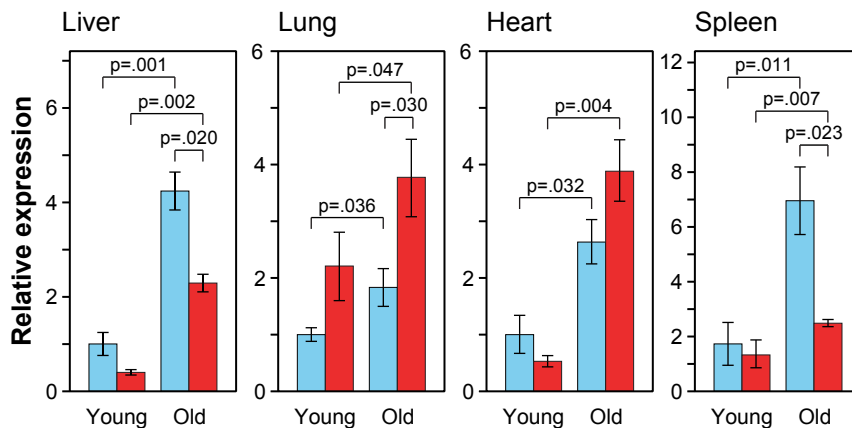

Supplement: NIHMS649288-supplement-4.pdf [file NIHMS649288-supplement-4.pdf]
